# Supplementary material for: fair-calibrate v1.4.1: calibration, constraining, and validation of the FaIR simple climate model for reliable future climate projections
Source: Copernicus journal article supplement (doi:10.5194/gmd-17-8569-2024), 2024-12-03
Supplement: Supplementary file 1 [file gmd-17-8569-2024-supplement.pdf]

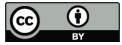

*Supplement of*

**fair-calibrate v1.4.1: calibration, constraining, and validation of the FaIR simple climate model for reliable future climate projections**

**Chris Smith et al.**

*Correspondence to:* Chris Smith ([chris.smith@vub.be](mailto:chris.smith@vub.be))

The copyright of individual parts of the supplement might differ from the article licence.

| Model           | $\kappa_1$ | $\kappa_2$ | $\kappa_3$ | $C_1$ | $C_2$ | $C_3$ | $\epsilon$ | $\gamma$ | $\sigma_\xi$ | $\sigma_\eta$ | $F_{4\times\text{CO}_2}$ | ECS  | TCR  |
|-----------------|------------|------------|------------|-------|-------|-------|------------|----------|--------------|---------------|--------------------------|------|------|
| ACCESS-CM2      | 0.67       | 2.81       | 0.68       | 3.73  | 11.6  | 86    | 1.35       | 1.62     | 0.53         | 0.45          | 7.19                     | 5.36 | 2.48 |
| ACCESS-ESM1-5   | 0.70       | 3.58       | 0.84       | 3.77  | 8.9   | 87    | 1.56       | 2.74     | 0.60         | 0.64          | 6.56                     | 4.69 | 2.00 |
| AWI-CM-1-1-MR   | 1.22       | 1.79       | 0.66       | 4.14  | 11.0  | 47    | 1.32       | 3.97     | 0.65         | 0.94          | 8.02                     | 3.28 | 2.17 |
| BCC-CSM2-MR     | 1.06       | 2.13       | 0.85       | 4.16  | 11.8  | 63    | 1.25       | 2.30     | 0.34         | 0.54          | 6.71                     | 3.15 | 1.87 |
| BCC-ESM1        | 0.88       | 1.48       | 0.91       | 5.35  | 15.8  | 77    | 1.29       | 1.88     | 0.31         | 0.39          | 6.25                     | 3.53 | 1.91 |
| CAMS-CSM1-0     | 1.88       | 5.32       | 0.65       | 2.61  | 9.1   | 52    | 1.25       | 27.69    | 0.45         | 2.66          | 8.86                     | 2.35 | 1.73 |
| CAS-ESM2-0      | 0.93       | 2.50       | 0.67       | 3.56  | 8.6   | 55    | 1.33       | 1.89     | 0.41         | 0.52          | 6.97                     | 3.74 | 2.18 |
| CESM2           | 0.65       | 3.88       | 0.90       | 4.83  | 6.4   | 71    | 1.68       | 2.80     | 0.49         | 0.71          | 8.18                     | 6.29 | 2.49 |
| CESM2-FV2       | 0.54       | 4.01       | 1.01       | 3.86  | 7.0   | 86    | 1.75       | 2.71     | 0.61         | 0.88          | 7.36                     | 6.84 | 2.24 |
| CESM2-WACCM     | 0.72       | 7.33       | 0.84       | 3.82  | 6.2   | 85    | 1.59       | 2.98     | 0.51         | 0.70          | 8.07                     | 5.60 | 2.31 |
| CESM2-WACCM-FV2 | 0.56       | 3.52       | 0.94       | 3.39  | 9.5   | 107   | 1.50       | 2.89     | 0.53         | 0.94          | 6.73                     | 5.98 | 2.16 |
| CIESM           | 0.68       | 2.65       | 1.00       | 5.28  | 11.6  | 69    | 1.35       | 0.81     | 0.55         | 0.36          | 8.48                     | 6.26 | 2.69 |
| CMCC-CM2-SR5    | 1.08       | 2.15       | 0.72       | 3.48  | 11.5  | 53    | 1.29       | 25.58    | 0.80         | 2.69          | 8.08                     | 3.74 | 2.30 |
| CNRM-CM6-1      | 0.78       | 1.56       | 0.67       | 3.22  | 16.1  | 116   | 0.91       | 24.01    | 0.47         | 1.67          | 7.32                     | 4.70 | 2.66 |
| CNRM-CM6-1-HR   | 0.94       | 1.99       | 0.65       | 4.16  | 11.8  | 90    | 0.80       | 7.10     | 0.48         | 0.69          | 7.70                     | 4.10 | 2.57 |
| CNRM-ESM2-1     | 0.68       | 2.62       | 0.69       | 3.53  | 7.6   | 104   | 0.83       | 4.67     | 0.50         | 0.89          | 5.90                     | 4.35 | 2.39 |
| CanESM5         | 0.62       | 2.48       | 0.61       | 3.63  | 10.6  | 73    | 1.12       | 2.62     | 0.48         | 0.42          | 7.33                     | 5.93 | 2.92 |
| E3SM-1-0        | 0.58       | 2.37       | 0.37       | 3.65  | 9.6   | 42    | 1.49       | 3.07     | 0.60         | 0.91          | 7.05                     | 6.03 | 3.10 |
| EC-Earth3       | 0.82       | 2.65       | 0.56       | 3.24  | 10.5  | 34    | 1.25       | 25.38    | 0.74         | 2.26          | 7.12                     | 4.33 | 2.53 |
| EC-Earth3-Veg   | 0.84       | 2.32       | 0.60       | 3.24  | 10.3  | 31    | 1.26       | 25.91    | 0.69         | 2.68          | 7.48                     | 4.46 | 2.65 |
| FGOALS-f3-L     | 1.44       | 5.65       | 0.71       | 1.97  | 10.4  | 71    | 1.52       | 29.14    | 0.63         | 2.75          | 9.33                     | 3.25 | 2.02 |
| FGOALS-g3       | 1.26       | 2.84       | 0.91       | 4.07  | 7.8   | 91    | 1.26       | 1.20     | 0.44         | 0.24          | 7.65                     | 3.04 | 1.86 |
| FIO-ESM-2-0     | 0.87       | 4.67       | 0.87       | 3.02  | 8.4   | 91    | 1.32       | 25.96    | 0.60         | 1.62          | 8.13                     | 4.67 | 2.31 |
| GFDL-CM4        | 1.00       | 2.79       | 1.25       | 5.31  | 0.2   | 81    | 1.81       | 2.72     | 0.71         | 0.95          | 9.02                     | 4.50 | 2.19 |
| GFDL-ESM4       | 1.38       | 1.92       | 0.84       | 4.32  | 10.6  | 124   | 1.02       | 4.32     | 0.49         | 1.07          | 7.36                     | 2.66 | 1.79 |
| GISS-E2-1-G     | 1.44       | 2.09       | 1.20       | 3.59  | 10.6  | 163   | 1.09       | 2.89     | 0.66         | 0.53          | 8.02                     | 2.78 | 1.76 |
| GISS-E2-1-H     | 1.11       | 4.31       | 0.78       | 2.24  | 9.7   | 78    | 1.19       | 3.62     | 0.59         | 0.55          | 7.20                     | 3.25 | 1.93 |
| GISS-E2-2-G     | 1.97       | 1.92       | 0.63       | 3.60  | 11.3  | 314   | 0.44       | 2.39     | 0.54         | 0.54          | 8.04                     | 2.04 | 1.68 |
| HadGEM3-GC31-LL | 0.61       | 2.85       | 0.64       | 3.87  | 9.3   | 66    | 1.17       | 3.13     | 0.61         | 0.46          | 7.22                     | 5.91 | 2.83 |
| HadGEM3-GC31-MM | 0.65       | 2.01       | 0.69       | 3.40  | 14.1  | 65    | 1.04       | 3.13     | 0.43         | 0.50          | 7.16                     | 5.54 | 2.77 |
| IITM-ESM        | 1.99       | 2.80       | 1.00       | 3.76  | 12.0  | 150   | 1.06       | 2.95     | 0.54         | 1.15          | 9.43                     | 2.37 | 1.67 |
| INM-CM4-8       | 1.58       | 1.90       | 0.55       | 4.35  | 9.8   | 22    | 1.45       | 2.51     | 0.26         | 0.44          | 5.94                     | 1.88 | 1.41 |
| INM-CM5-0       | 1.54       | 1.90       | 0.58       | 4.58  | 11.4  | 49    | 1.45       | 1.92     | 0.32         | 0.44          | 6.23                     | 2.02 | 1.42 |
| IPSL-CM6A-LR    | 0.72       | 1.76       | 0.48       | 3.40  | 13.2  | 62    | 1.28       | 3.22     | 0.49         | 0.90          | 7.05                     | 4.90 | 2.70 |
| KACE-1-0-G      | 0.73       | 3.63       | 0.87       | 2.54  | 8.7   | 101   | 1.25       | 2.08     | 0.35         | 0.36          | 7.80                     | 5.36 | 2.50 |
| KIOST-ESM       | 0.93       | 3.05       | 0.95       | 2.15  | 9.6   | 95    | 1.41       | 2.35     | 0.32         | 0.61          | 7.22                     | 3.87 | 1.99 |
| MIROC-ES2L      | 1.95       | 1.71       | 0.70       | 4.56  | 16.6  | 204   | 0.45       | 1.95     | 0.95         | 0.71          | 8.81                     | 2.25 | 1.78 |
| MIROC6          | 2.00       | 1.20       | 0.60       | 4.27  | 22.9  | 350   | 0.38       | 1.86     | 0.89         | 0.71          | 8.57                     | 2.15 | 1.71 |
| MPI-ESM-1-2-HAM | 1.30       | 2.14       | 0.97       | 4.93  | 14.6  | 105   | 1.38       | 2.54     | 0.49         | 0.55          | 8.48                     | 3.27 | 1.94 |
| MPI-ESM1-2-HR   | 1.17       | 1.59       | 1.11       | 5.12  | 23.6  | 73    | 1.56       | 3.49     | 0.44         | 0.57          | 7.82                     | 3.34 | 1.89 |
| MPI-ESM1-2-LR   | 1.40       | 1.95       | 1.07       | 5.15  | 10.7  | 95    | 1.26       | 2.40     | 0.71         | 0.47          | 8.93                     | 3.19 | 2.01 |
| MRI-ESM2-0      | 1.11       | 2.85       | 1.25       | 4.24  | 10.5  | 94    | 1.33       | 2.99     | 0.52         | 0.98          | 7.56                     | 3.41 | 1.80 |
| NESM3           | 0.96       | 1.05       | 0.48       | 2.49  | 19.2  | 126   | 0.72       | 2.80     | 0.27         | 0.55          | 8.15                     | 4.23 | 2.85 |
| NorCPM1         | 1.03       | 2.07       | 1.33       | 5.72  | 17.6  | 92    | 1.51       | 1.81     | 0.50         | 0.49          | 7.26                     | 3.52 | 1.75 |
| NorESM2-LM      | 1.70       | 1.56       | 7.21       | 4.56  | 0.4   | 120   | 1.61       | 1.68     | 0.74         | 1.30          | 9.40                     | 2.76 | 1.64 |
| NorESM2-MM      | 1.96       | 0.79       | 7.23       | 4.12  | 121.5 | 0     | 1.20       | 1.49     | 0.66         | 1.31          | 9.10                     | 2.32 | 1.71 |

|             |      |      |      |      |      |     |      |      |      |      |      |      |      |
|-------------|------|------|------|------|------|-----|------|------|------|------|------|------|------|
| SAM0-UNICON | 1.04 | 2.69 | 1.03 | 4.63 | 6.3  | 111 | 1.25 | 2.44 | 0.64 | 0.80 | 8.36 | 4.01 | 2.20 |
| TaiESM1     | 0.87 | 2.31 | 0.92 | 5.06 | 9.0  | 91  | 1.23 | 2.04 | 0.69 | 0.46 | 8.15 | 4.67 | 2.44 |
| UKESM1-0-LL | 0.66 | 2.60 | 0.61 | 2.92 | 11.3 | 73  | 1.13 | 3.55 | 0.44 | 0.50 | 7.38 | 5.63 | 2.84 |

Table S1: Parameters of the three-layer stochastic energy balance model for 49 CMIP6  $4\times\text{CO}_2$  forcing experiments. The ECS and TCR are calculated from the eigenvalue decomposition (see Leach et al. (2021)).

| PRIMAP-Hist category           | Gas                             | Lifetime (yr) (AR6) | GWP <sub>100</sub> (AR6) | Emissions scaling factor |
|--------------------------------|---------------------------------|---------------------|--------------------------|--------------------------|
| N <sub>2</sub> O               | N <sub>2</sub> O                | 109                 | 273                      | 1.08                     |
| NF <sub>3</sub>                | NF <sub>3</sub>                 | 569                 | 17400                    | 7.45                     |
| SF <sub>6</sub>                | SF <sub>6</sub>                 | 3200                | 25200                    | 1.05                     |
| HFCs                           | HFC-23                          | 228                 | 14600                    | 1.14                     |
|                                | HFC-32                          | 5.4                 | 771                      | 1.90                     |
|                                | HFC-125                         | 30                  | 3740                     | 0.85                     |
|                                | HFC-134a                        | 14                  | 5810                     | 1.07                     |
|                                | HFC-143a                        | 51                  | 5810                     | 0.91                     |
|                                | HFC-152a                        | 1.6                 | 164                      | 1.10                     |
|                                | HFC-227ea                       | 36                  | 3600                     | 1.07                     |
|                                | HFC-236fa                       | 213                 | 8690                     | 1.09                     |
|                                | HFC-245fa                       | 7.9                 | 962                      | 0.97                     |
|                                | HFC-365mfc                      | 8.9                 | 914                      | 0.96                     |
|                                | HFC-4310mee                     | 17                  | 1600                     | 1.03                     |
| PFCs                           | CF <sub>4</sub>                 | 50000               | 7380                     | 1.34                     |
|                                | C <sub>2</sub> F <sub>6</sub>   | 10000               | 12400                    | 1.51                     |
|                                | C <sub>3</sub> F <sub>8</sub>   | 2600                | 9290                     | 1.72                     |
|                                | c-C <sub>4</sub> F <sub>8</sub> | 3200                | 10200                    | 1.68                     |
|                                | C <sub>4</sub> F <sub>10</sub>  | 2600                | 10000                    | 1.71                     |
|                                | C <sub>5</sub> F <sub>12</sub>  | 4100                | 9220                     | 1.75                     |
|                                | C <sub>6</sub> F <sub>14</sub>  | 3100                | 8620                     | 1.21                     |
|                                | C <sub>7</sub> F <sub>16</sub>  | 3000                | 8410                     | 1.37                     |
| C <sub>8</sub> F <sub>18</sub> | 3000                            | 8260                | 1.54                     |                          |

**Table S2.** Data relating to the non-CO<sub>2</sub>, non-CH<sub>4</sub> greenhouse gas emissions scalings used in `fair-calibrate v1.4.1`. The GWP<sub>100</sub> values are used for the HFC and PFC disaggregations. Note this is not an exhaustive list of minor greenhouse gases in FaIR (refer to Leach et al. (2021) for the default species used in the model).

| Parameter name            | Domain            | Description                                           |
|---------------------------|-------------------|-------------------------------------------------------|
| cc_co2_concentration_1750 | Carbon cycle      | CO <sub>2</sub> concentration in 1750 (section 3.2.4) |
| cc_rA                     | Carbon cycle      | $r_A$ in eq. (7)                                      |
| cc_rU                     | Carbon cycle      | $r_A$ in eq. (7)                                      |
| cc_rT                     | Carbon cycle      | $r_T$ in eq. (7)                                      |
| cc_r0                     | Carbon cycle      | $r_0$ in eq. (7)                                      |
| ari_BC                    | Aerosol-radiation | ERFari contribution from BC emissions (table 3)       |
| ari_OC                    | Aerosol-radiation | ERFari from OC emissions (table 3)                    |

|                        |                   |                                                                          |
|------------------------|-------------------|--------------------------------------------------------------------------|
| ari_Sulfur             | Aerosol-radiation | ERFari from SO <sub>2</sub> emissions (table 3)                          |
| ari_NH3                | Aerosol-radiation | ERFari from NH <sub>3</sub> emissions (table 3)                          |
| ari_NOx                | Aerosol-radiation | ERFari from NO <sub>x</sub> emissions (table 3)                          |
| ari_VOC                | Aerosol-radiation | ERFari from VOC emissions (table 3)                                      |
| ari_CH4                | Aerosol-radiation | ERFari from CH <sub>4</sub> concentration (table 3)                      |
| ari_N2O                | Aerosol-radiation | ERFari from N <sub>2</sub> O concentration (table 3)                     |
| ari_EESC               | Aerosol-radiation | ERFari from EESC (table 3)                                               |
| aci_shape_so2          | Aerosol-cloud     | $s_{SO_2}$ in eq. (8)                                                    |
| aci_shape_bc           | Aerosol-cloud     | $s_{BC}$ in eq. (8)                                                      |
| aci_shape_oc           | Aerosol-cloud     | $s_{OC}$ in eq. (8)                                                      |
| aci_beta               | Aerosol-cloud     | $\beta$ in eq. (8)                                                       |
| clim_F_4xCO2           | Climate response  | Effective radiative forcing for quadrupled CO <sub>2</sub>               |
| clim_c1                | Climate response  | $C_1$ in eq. (1)                                                         |
| clim_c2                | Climate response  | $C_2$ in eq. (2)                                                         |
| clim_c3                | Climate response  | $C_3$ in eq. (3)                                                         |
| clim_kappa1            | Climate response  | $\kappa_1$ in eq. (1)                                                    |
| clim_kappa2            | Climate response  | $\kappa_2$ in eqs. (1) and (2)                                           |
| clim_kappa3            | Climate response  | $\kappa_2$ in eqs. (2) and (3)                                           |
| clim_epsilon           | Climate response  | $\varepsilon$ in eq. (3)                                                 |
| clim_gamma             | Climate response  | $\gamma$ in eq. (4)                                                      |
| clim_sigma_eta         | Climate response  | Standard deviation of $\xi$ in eq. (1)                                   |
| clim_sigma_xi          | Climate response  | Standard deviation of $\eta$ in eq. (4)                                  |
| o3_CH4                 | Ozone             | Contribution to O <sub>3</sub> from CH <sub>4</sub> (table 4)            |
| o3_N2O                 | Ozone             | Contribution to O <sub>3</sub> from N <sub>2</sub> O (table 4)           |
| o3_EESC                | Ozone             | Contribution to O <sub>3</sub> from EESC concentration (table 4)         |
| o3_VOC                 | Ozone             | Contribution to O <sub>3</sub> from VOC (table 4)                        |
| o3_CO                  | Ozone             | Contribution to O <sub>3</sub> from CO (table 4)                         |
| o3_NOx                 | Ozone             | Contribution to O <sub>3</sub> from NO <sub>x</sub> (table 4)            |
| fscale_CO2             | Forcing           | Scale factor for CO <sub>2</sub> forcing (table 5)                       |
| fscale_CH4             | Forcing           | Scale factor for CH <sub>4</sub> forcing (table 5)                       |
| fscale_N2O             | Forcing           | Scale factor for N <sub>2</sub> O forcing (table 5)                      |
| fscale_minorGHG        | Forcing           | Scale factor for other GHG forcing (table 5)                             |
| fscale_stratH2O        | Forcing           | Scale factor for H <sub>2</sub> O from CH <sub>4</sub> forcing (table 5) |
| fscale_LAPSI           | Forcing           | Scale factor for BC on snow forcing (table 5)                            |
| fscale_landuse         | Forcing           | Scale factor for land use forcing (table 5)                              |
| fscale_volcanic        | Forcing           | Scale factor for volcanic forcing (table 5)                              |
| fscale_solar_trend     | Forcing           | linear trend in solar forcing (table 5)                                  |
| fscale_solar_amplitude | Forcing           | Scale factor for amplitude of solar cycle (table 5)                      |

Table S3: The 45 parameters or inputs to FaIR that are probabilistically sampled in `fair-calibrate v1.4.1` and `v1.4.0`. Table or section numbers refer to the main text and indicate prior distributions for `fair-calibrate v1.4.1`. Where no table or section number is given, the prior distribution is a kernel density estimate from CMIP6 model calibrations. Horizontal lines delimitate components of the Earth system that are calibrated together, and for kernel density estimates describe those components where the prior distributions are correlated.

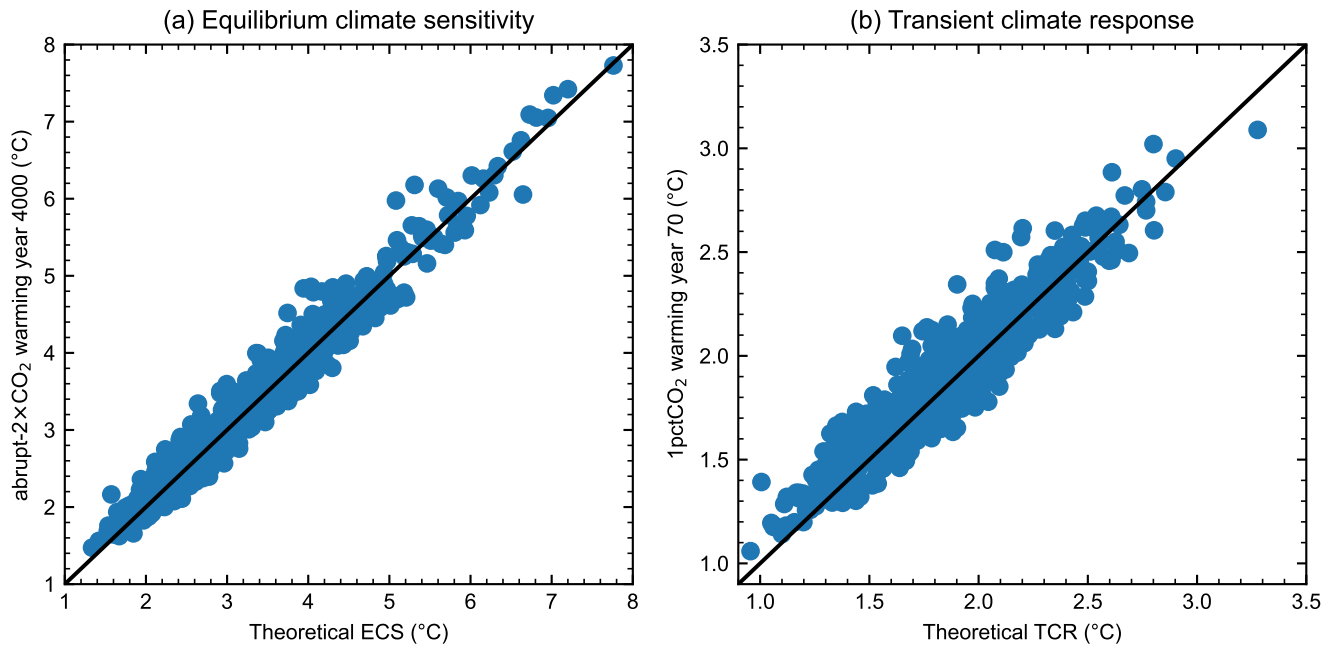

**Figure S1.** Comparisons of the theoretical (a) ECS and (b) TCR derived from the impulse-response formulation of the energy balance model (Leach et al., 2021) with the model-calculated values from abrupt-2×CO<sub>2</sub> and 1pctCO<sub>2</sub> simulations in FaIR.

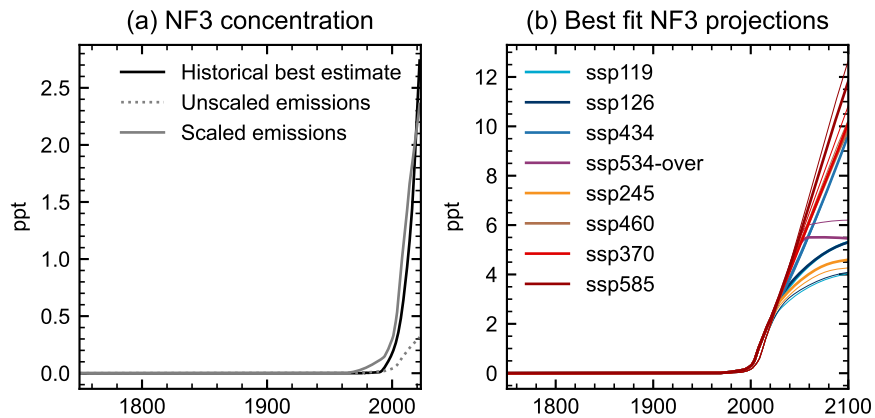

**Figure S2.** As for fig. 2, showing NF<sub>3</sub> as an example where (a) a large scaling factor applied to the historical emissions better reproduces concentrations, and (b) when applied, future concentration projections are in line with the CMIP6 SSPs (Meinshausen et al., 2020).

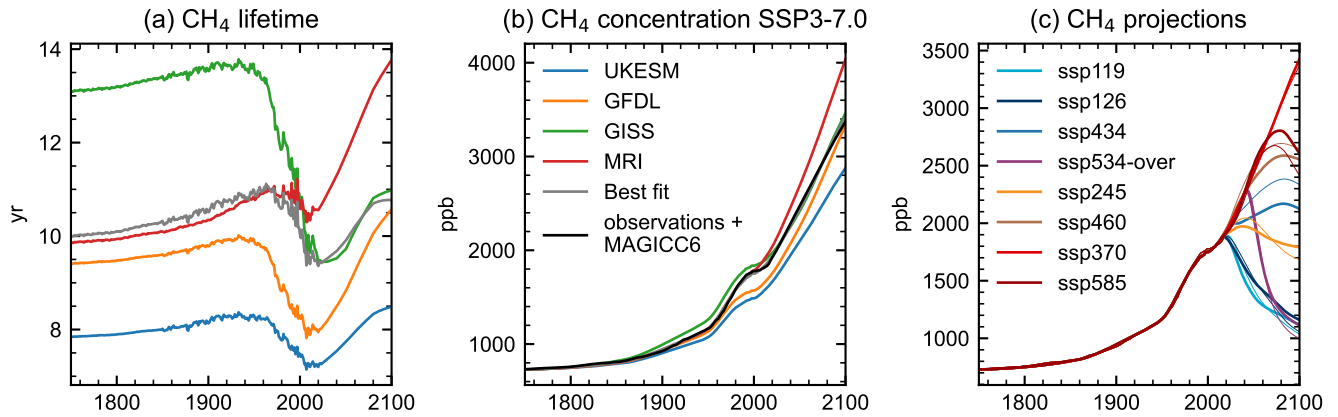

**Figure S3.** As for fig. 3, for *fair-calibrate* v1.4.0. Subplot (b) shows projected concentrations under SSP3-7.0 with each AerChemMIP model's estimates lifetimes from (a).

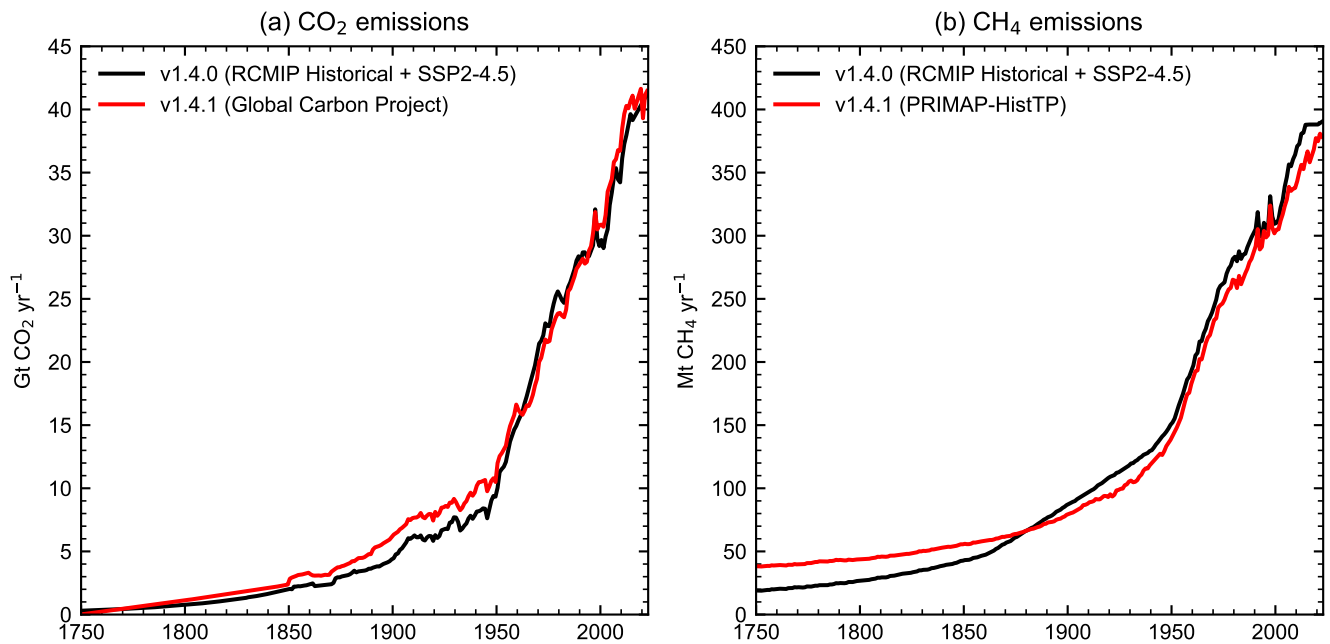

**Figure S4.** Comparison of (a) CO<sub>2</sub> emissions and (b) CH<sub>4</sub> emissions used in *fair-calibrate* v1.4.0 (black) and v1.4.1 (red).

Distributions and correlations of CMIP6 calibrations

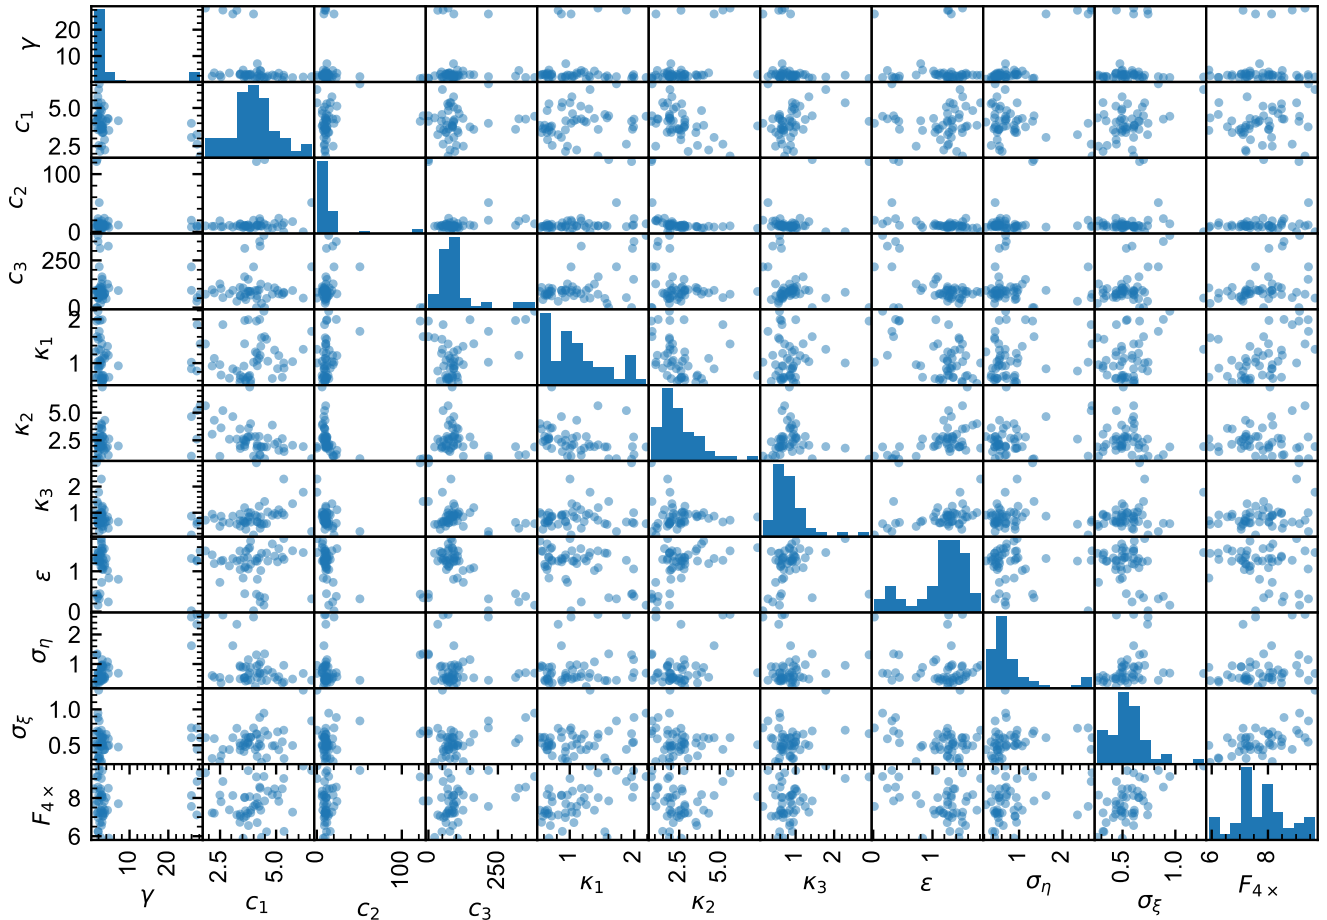

**Figure S5.** Matrix plot showing the calibrated parameters from the three-layer energy balance model, their distributions (on the diagonal) and correlations between parameters (off diagonal). These model-fitted parameters are used to draw an 11-dimensional kernel density estimate that is sampled from to inform the climate response.

| Metric                                            | Target |         |       | Reweighted posterior |         |       | Relative difference |         |       | Fit? |
|---------------------------------------------------|--------|---------|-------|----------------------|---------|-------|---------------------|---------|-------|------|
|                                                   | lower  | central | upper | lower                | central | upper | lower               | central | upper |      |
| ECS (K)                                           | 2.00   | 3.00    | 5.00  | 2.01                 | 2.99    | 4.94  | 0%                  | 0%      | -1%   | Yes  |
| TCR (K)                                           | 1.20   | 1.80    | 2.40  | 1.30                 | 1.81    | 2.38  | +9%                 | 0%      | -1%   | Yes  |
| GMST 2003–2022 rel. 1850–1900 (K)                 | 0.87   | 1.03    | 1.13  | 0.88                 | 1.03    | 1.14  | +1%                 | 0%      | +1%   | Yes  |
| EEU 2020 rel. 1971 (ZJ)                           | 356.8  | 465.3   | 573.8 | 350.5                | 467.9   | 569.4 | -2%                 | +1%     | -1%   | Yes  |
| Aerosol ERF 2005–2014 rel. 1750 ( $W m^{-2}$ )    | -2.0   | -1.3    | -0.6  | -1.98                | -1.30   | -0.58 | -1%                 | 0%      | -4%   | Yes  |
| ERFari 2005–2014 rel. 1750 ( $W m^{-2}$ )         | -0.6   | -0.3    | 0.0   | -0.58                | -0.29   | +0.01 | -4%                 | -4%     |       | Yes  |
| ERFaci 2005–2014 rel. 1750 ( $W m^{-2}$ )         | -1.7   | -1.0    | -0.3  | -1.68                | -0.98   | -0.34 | -1%                 | -2%     | +12%  | Yes  |
| CO <sub>2</sub> concentration 2022 (ppm)          | 416.2  | 417.0   | 417.8 | 416.2                | 417.0   | 417.9 | 0%                  | 0%      | 0%    | Yes  |
| WMGHG ERF 2019 rel. 1750 ( $W m^{-2}$ )           | 3.03   | 3.32    | 3.61  | 3.01                 | 3.28    | 3.57  | -1%                 | -1%     | -1%   |      |
| CH <sub>4</sub> ERF 2019 rel. 1750 ( $W m^{-2}$ ) | 0.43   | 0.54    | 0.65  | 0.44                 | 0.56    | 0.67  | +3%                 | +3%     | +2%   |      |
| Airborne fraction at $2 \times CO_2^*$            | 0.43   | 0.53    | 0.63  | 0.50                 | 0.51    | 0.52  | +16%                | -4%     | -18%  |      |
| Airborne fraction at $4 \times CO_2^*$            | 0.44   | 0.60    | 0.76  | 0.53                 | 0.58    | 0.62  | +21%                | -3%     | -19%  |      |
| TCRE* ( $K (1000 GtC)^{-1}$ )                     | 0.58   | 1.65    | 2.72  | 1.16                 | 1.57    | 2.07  | +99%                | -5%     | -24%  |      |
| SSP1-1.9 2021–2040 rel. 1995–2014 (K)             | 0.38   | 0.61    | 0.85  | 0.35                 | 0.59    | 0.91  | -9%                 | -4%     | +8%   |      |
| SSP1-1.9 2041–2060 rel. 1995–2014 (K)             | 0.40   | 0.71    | 1.07  | 0.33                 | 0.71    | 1.26  | -18%                | -1%     | +18%  |      |
| SSP1-1.9 2081–2100 rel. 1995–2014 (K)             | 0.24   | 0.56    | 0.96  | 0.14                 | 0.58    | 1.35  | -40%                | +4%     | +41%  |      |
| SSP1-2.6 2021–2040 rel. 1995–2014 (K)             | 0.41   | 0.63    | 0.89  | 0.37                 | 0.61    | 0.92  | -10%                | -4%     | +3%   |      |
| SSP1-2.6 2041–2060 rel. 1995–2014 (K)             | 0.54   | 0.88    | 1.32  | 0.48                 | 0.87    | 1.44  | -11%                | -2%     | +9%   |      |
| SSP1-2.6 2081–2100 rel. 1995–2014 (K)             | 0.51   | 0.90    | 1.48  | 0.39                 | 0.89    | 1.73  | -23%                | -1%     | +17%  |      |
| SSP2-4.5 2021–2040 rel. 1995–2014 (K)             | 0.44   | 0.66    | 0.90  | 0.40                 | 0.60    | 0.86  | -8%                 | -8%     | -4%   |      |
| SSP2-4.5 2041–2060 rel. 1995–2014 (K)             | 0.78   | 1.12    | 1.57  | 0.71                 | 1.06    | 1.54  | -9%                 | -6%     | -2%   |      |
| SSP2-4.5 2081–2100 rel. 1995–2014 (K)             | 1.24   | 1.81    | 2.59  | 1.06                 | 1.71    | 2.68  | -14%                | -6%     | +3%   |      |
| SSP3-7.0 2021–2040 rel. 1995–2014 (K)             | 0.45   | 0.67    | 0.92  | 0.41                 | 0.59    | 0.83  | -8%                 | -13%    | -9%   |      |
| SSP3-7.0 2041–2060 rel. 1995–2014 (K)             | 0.92   | 1.28    | 1.75  | 0.86                 | 1.15    | 1.56  | -7%                 | -10%    | -11%  |      |
| SSP3-7.0 2081–2100 rel. 1995–2014 (K)             | 2.00   | 2.76    | 3.75  | 1.85                 | 2.53    | 3.52  | -8%                 | -8%     | -6%   |      |
| SSP5-8.5 2021–2040 rel. 1995–2014 (K)             | 0.51   | 0.76    | 1.04  | 0.48                 | 0.69    | 1.02  | -7%                 | -9%     | -2%   |      |
| SSP5-8.5 2041–2060 rel. 1995–2014 (K)             | 1.08   | 1.54    | 2.08  | 1.01                 | 1.45    | 2.06  | -6%                 | -6%     | -1%   |      |
| SSP5-8.5 2081–2100 rel. 1995–2014 (K)             | 2.44   | 3.50    | 4.82  | 2.32                 | 3.35    | 4.78  | -5%                 | -4%     | -1%   |      |

**Table S4.** As for table 5 for `fair-calibrate v1.4.0`. Dark shading is more than 20% from the target for upper and lower ranges and 10% for the central. Paler shading is more than 10% from the target for upper and lower ranges and 5% for the central.

## References

- Leach, N. J., Jenkins, S., Nicholls, Z., Smith, C. J., Lynch, J., Cain, M., Walsh, T., Wu, B., Tsutsui, J., and Allen, M. R.: FaIRv2.0.0: a generalized impulse response model for climate uncertainty and future scenario exploration, *Geoscientific Model Development*, 14, 3007–3036, <https://doi.org/10.5194/gmd-14-3007-2021>, 2021.
- 5 Meinshausen, M., Nicholls, Z. R. J., Lewis, J., Gidden, M. J., Vogel, E., Freund, M., Beyerle, U., Gessner, C., Nauels, A., Bauer, N., Canadell, J. G., Daniel, J. S., John, A., Krummel, P. B., Luderer, G., Meinshausen, N., Montzka, S. A., Rayner, P. J., Reimann, S., Smith, S. J., van den Berg, M., Velders, G. J. M., Vollmer, M. K., and Wang, R. H. J.: The shared socio-economic pathway (SSP) greenhouse gas concentrations and their extensions to 2500, *Geoscientific Model Development*, 13, 3571–3605, <https://doi.org/10.5194/gmd-13-3571-2020>, <https://gmd.copernicus.org/articles/13/3571/2020/>, 2020.
